# Supplementary material
Source: publisher figshare collection journal article supplement (https://asha.figshare.com/articles/dataset/_/5913532)
Supplement: Supplementary file 1 [file 1]

**Supplemental Material S1.** Intraclass correlation coefficients (ICC) with 95% confidence intervals (CI).

| Measure                       | ICC Value | 95% CI     |
|-------------------------------|-----------|------------|
| Formant (F5)                  | .953      | .713–.993  |
| Formant (F4)                  | .855      | .136–.979  |
| Formant (F3)                  | .994      | –4.28–.677 |
| Formant (F2)                  | .947      | .680–.992  |
| Formant (F1)                  | .785      | –1.09–.971 |
| Lung volume initiation (LVI)  | .992      | .375–.999  |
| Lung volume termination (LVT) | .992      | .782–.999  |
| Lung volume excursion (LVE)   | .864      | –.150–.983 |
| Rib cage initiation (RCI)     | .998      | .785–1.00  |
| Rib cage termination (RCT)    | .998      | .987–1.00  |
| Rib cage excursion (RCE)      | .987      | .923–.998  |
| Abdominal initiation (ABI)    | .959      | .537–.995  |
| Abdominal termination (ABT)   | .938      | –.58–.993  |
| Abdominal excursion (ABE)     | .744      | –2.12–.964 |
