# Supplementary material
Source: publisher figshare collection journal article supplement (https://asha.figshare.com/articles/dataset/_/5913532)
Supplement: Supplementary file 2 [file 1]

**Supplemental Material S2.** Descriptive statistics: group means, standard deviations, and ranges by condition (pre recurrent laryngeal nerve [RLN] block [PRE], during RLN block [DUR], and post-RLN block recovered [REC]).

| Measures                                                                                                                                                                                                                                                                                                                  | Condition | Mean   | (SD)     | Range          |
|---------------------------------------------------------------------------------------------------------------------------------------------------------------------------------------------------------------------------------------------------------------------------------------------------------------------------|-----------|--------|----------|----------------|
| <i>Acoustic measures – Distance between formants in “cents”</i>                                                                                                                                                                                                                                                           |           |        |          |                |
| <b>F5–F4</b>                                                                                                                                                                                                                                                                                                              | PRE       | 496.7  | (135.96) | 218–680        |
|                                                                                                                                                                                                                                                                                                                           | DUR       | 423.4  | (99.37)  | 232–586        |
|                                                                                                                                                                                                                                                                                                                           | REC       | 537    | (146.28) | 279–689        |
| <b>F4–F3</b>                                                                                                                                                                                                                                                                                                              | PRE       | 591.2  | (106.48) | 430–742        |
|                                                                                                                                                                                                                                                                                                                           | DUR       | 621    | (80.42)  | 525–778        |
|                                                                                                                                                                                                                                                                                                                           | REC       | 591.6  | (84.31)  | 460–710        |
| <b>F3–F2</b>                                                                                                                                                                                                                                                                                                              | PRE       | 1570.2 | (167.85) | 1354–1859      |
|                                                                                                                                                                                                                                                                                                                           | DUR       | 1533   | (262.86) | 1002–1870      |
|                                                                                                                                                                                                                                                                                                                           | REC       | 1504.5 | (160.62) | 1343–1847      |
| <b>F2–F1</b>                                                                                                                                                                                                                                                                                                              | PRE       | 739.8  | (134.02) | 548–947        |
|                                                                                                                                                                                                                                                                                                                           | DUR       | 1183.7 | (259.39) | 845–1601       |
|                                                                                                                                                                                                                                                                                                                           | REC       | 640.6  | (196.99) | 239–911        |
| <i>Aerodynamic measures – Estimated subglottic pressure in centimeters of water (<math>P_s</math> in cmH<sub>2</sub>O), mean peak airflow in liters per second (flow in L/s)</i>                                                                                                                                          |           |        |          |                |
| <b>Ps</b>                                                                                                                                                                                                                                                                                                                 | PRE       | 6.93   | (1.59)   | 4.69 – 8.82    |
|                                                                                                                                                                                                                                                                                                                           | DUR       | 6.92   | (1.98)   | 3.81 – 10.09   |
|                                                                                                                                                                                                                                                                                                                           | REC       | 7.77   | (2.2)    | 4.98 – 12.29   |
| <b>Flow</b>                                                                                                                                                                                                                                                                                                               | PRE       | 0.10   | (0.06)   | 0.02 – 0.23    |
|                                                                                                                                                                                                                                                                                                                           | DUR       | 0.20   | (0.12)   | 0.06 – 0.47    |
|                                                                                                                                                                                                                                                                                                                           | REC       | 0.11   | (0.07)   | 0.03 – 0.22    |
| <i>Respiratory measures – Lung volume initiation, termination, and excursion (LVI, LVT, LVE); rib cage initiation, termination, and excursion (RCI, RCT, RCE); and abdominal initiation, termination, and excursion (ABI, ABT, ABE) as % of vital capacity and relative to end expiratory level (%VC relative to EEL)</i> |           |        |          |                |
| <b>LVI</b>                                                                                                                                                                                                                                                                                                                | PRE       | 30.93  | (8.81)   | 15.66 – 43.98  |
|                                                                                                                                                                                                                                                                                                                           | DUR       | 24.17  | (11.98)  | 5.4 – 43.14    |
|                                                                                                                                                                                                                                                                                                                           | REC       | 22.72  | (12.29)  | 5.84 – 40.25   |
| <b>LVT</b>                                                                                                                                                                                                                                                                                                                | PRE       | 19.40  | (10.44)  | 1.77 – 33.28   |
|                                                                                                                                                                                                                                                                                                                           | DUR       | 8.46   | (17.05)  | -16.45 – 33.1  |
|                                                                                                                                                                                                                                                                                                                           | REC       | 9.59   | (13.66)  | -8.53 – 27.81  |
| <b>LVE</b>                                                                                                                                                                                                                                                                                                                | PRE       | 11.54  | (3.96)   | 6.38 – 19.51   |
|                                                                                                                                                                                                                                                                                                                           | DUR       | 15.71  | (6.16)   | 10.03 – 29.17  |
|                                                                                                                                                                                                                                                                                                                           | REC       | 13.13  | (3.99)   | 8.94 – 22.54   |
| <b>RCI</b>                                                                                                                                                                                                                                                                                                                | PRE       | 32.33  | (12.90)  | 14.47 – 55.92  |
|                                                                                                                                                                                                                                                                                                                           | DUR       | 26.19  | (14.83)  | 6.1 – 57.59    |
|                                                                                                                                                                                                                                                                                                                           | REC       | 23.30  | (15.13)  | 0.57 – 47.27   |
| <b>RCT</b>                                                                                                                                                                                                                                                                                                                | PRE       | 22.93  | (14.67)  | 6.95 – 51.02   |
|                                                                                                                                                                                                                                                                                                                           | DUR       | 12.53  | (18.48)  | -9.56 – 51.05  |
|                                                                                                                                                                                                                                                                                                                           | REC       | 13.76  | (15.83)  | -7.63 – 41.05  |
| <b>RCE</b>                                                                                                                                                                                                                                                                                                                | PRE       | 9.41   | (4.31)   | 4.33 – 15.89   |
|                                                                                                                                                                                                                                                                                                                           | DUR       | 13.66  | (6.83)   | 6.53 – 30.7    |
|                                                                                                                                                                                                                                                                                                                           | REC       | 9.54   | (2.77)   | 6.21 – 15.9    |
| <b>ABI</b>                                                                                                                                                                                                                                                                                                                | PRE       | 19.17  | (7.10)   | 5.69 – 28.81   |
|                                                                                                                                                                                                                                                                                                                           | DUR       | 12.64  | (9.91)   | -2.17 – 29.91  |
|                                                                                                                                                                                                                                                                                                                           | REC       | 13.78  | (8.97)   | 2.52 – 27.83   |
| <b>ABT</b>                                                                                                                                                                                                                                                                                                                | PRE       | 9.44   | (7.22)   | -2.48 – 21.24  |
|                                                                                                                                                                                                                                                                                                                           | DUR       | -1.05  | (16.63)  | -35.77 – 17.94 |
|                                                                                                                                                                                                                                                                                                                           | REC       | 1.40   | (10.05)  | -14.63 – 13.62 |
| <b>ABE</b>                                                                                                                                                                                                                                                                                                                | PRE       | 9.73   | (4.42)   | 2.32 – 17.68   |
|                                                                                                                                                                                                                                                                                                                           | DUR       | 13.70  | (9.07)   | 3.46 – 33.6    |
|                                                                                                                                                                                                                                                                                                                           | REC       | 12.39  | (5.88)   | 1.57 – 22.75   |
