# Supplementary material
Source: publisher figshare collection journal article supplement (https://asha.figshare.com/articles/dataset/_/5913532)
Supplement: Supplementary file 3 [file 1]

**Supplemental Material S3.** Repeated measures analysis of variance (ANOVA). Tukey's honestly significant difference test was applied to determine significant differences between conditions. \*\* $p < .05$ .

| Measures                    | <i>F</i> value ( <i>p</i> )<br>( <i>df</i> = 2) | Condition                                                                        |
|-----------------------------|-------------------------------------------------|----------------------------------------------------------------------------------|
| <i>Acoustic measures</i>    |                                                 |                                                                                  |
| <b>F5–F4</b>                | 4.80 (.021)*                                    | REC – DUR $p = .018^{**}$<br>PRE – DUR $p = .148$<br>REC – PRE $p = .054$        |
| <b>F4–F3</b>                | 2.72 (.093)                                     | DUR – PRE $p = .133$<br>DUR – REC $p = .139$<br>REC – PRE $p = .999$             |
| <b>F3–F2</b>                | 0.72 (.499)                                     | PRE – REC $p = .468$<br>PRE – DUR $p = .778$<br>DUR – REC $p = .862$             |
| <b>F2–F1</b>                | 17.57 (< .0001)*                                | DUR – REC $p < .0001^{**}$<br>DUR – PRE $p = .0007^{**}$<br>PRE – REC $p = .576$ |
| <i>Aerodynamic measures</i> |                                                 |                                                                                  |
| <b>P<sub>s</sub></b>        | 1.56 (.236)                                     | REC – DUR $p = .294$<br>REC – PRE $p = .305$<br>PRE – DUR $p = .999$             |
| <b>Flow</b>                 | 7.38 (.0046)*                                   | DUR – PRE $p = .0078^{**}$<br>DUR – REC $p = .0131^{**}$<br>REC – PRE $p = .968$ |
| <i>Respiratory measures</i> |                                                 |                                                                                  |
| <b>LVI</b>                  | 7.79 (.0036)*                                   | PRE – REC $p = .004^{**}$<br>PRE – DUR $p = .018^{**}$<br>DUR – REC $p = .792$   |
| <b>LVT</b>                  | 6.66 (.0068)*                                   | PRE – DUR $p = .010^{**}$<br>PRE – REC $p = .021^{**}$<br>REC – DUR $p = .938$   |
| <b>LVE</b>                  | 3.12 (.069)                                     | DUR – PRE $p = .058$<br>DUR – REC $p = .302$<br>REC – PRE $p = .618$             |
| <b>RCI</b>                  | 7.68 (.0039)*                                   | PRE – REC $p = .003^{**}$<br>PRE – DUR $p = .045^{**}$<br>DUR – REC $p = .452$   |
| <b>RCT</b>                  | 8.37 (.0027)*                                   | PRE – DUR $p = .004^{**}$<br>PRE – REC $p = .012^{**}$<br>REC – DUR $p = .898$   |
| <b>RCE</b>                  | 4.79 (.0215)*                                   | DUR – PRE $p = .036^{**}$<br>DUR – REC $p = .042^{**}$<br>REC – PRE $p = .996$   |
| <b>ABI</b>                  | 4.11 (.0339)*                                   | PRE – DUR $p = .038^{**}$<br>PRE – REC $p = .096$<br>REC – DUR $p = .887$        |
| <b>ABT</b>                  | 3.28 (.061)                                     | PRE – DUR $p = .061$<br>PRE – REC $p = .174$<br>REC – DUR $p = .837$             |
| <b>ABE</b>                  | 1.68 (.215)                                     | DUR – PRE $p = .199$<br>REC – PRE $p = .466$<br>DUR – REC $p = .827$             |

*Note.* LVI = lung volume initiation; LVT = lung volume termination; LVE = lung volume excursion; RCI = rib cage initiation; RCT = rib cage termination; RCE = rib cage excursion; ABI = abdominal initiation; ABT = abdominal termination; ABE = abdominal excursion.
